# Supplementary material for: Development, implementation and evaluation of an evidence-based program for introduction of new health technologies and clinical practices in a local healthcare setting
Source: Springer Nature journal article supplement (doi:10.1186/s12913-015-1178-4), 2015-06-01
Supplement: MOESM2 [file 9757934]

## Additional file 2: Best Practice Guide

| PRINCIPLES                                                                                                                                                                                                                                                     | Literature citations |             | Identified by Monash Health staff |     |     | Monash Health performance |     |
|----------------------------------------------------------------------------------------------------------------------------------------------------------------------------------------------------------------------------------------------------------------|----------------------|-------------|-----------------------------------|-----|-----|---------------------------|-----|
|                                                                                                                                                                                                                                                                | Dev<br>N=5           | Rev<br>N=16 | Dev                               | Imp | Rev | Dev                       | Rev |
| <i>Dev = Development phase, Imp = Implementation phase, Rev = Revision phase, N/A = Not applicable (identified after Development phase)</i><br><i>✓ = Principles incorporated in Monash Health processes, + = Principles identified by Monash Health staff</i> |                      |             |                                   |     |     |                           |     |
| <b>Governance</b>                                                                                                                                                                                                                                              |                      |             |                                   |     |     |                           |     |
| A Technology/Clinical Practice Committee (TCPC) is established                                                                                                                                                                                                 | 5                    | 16          |                                   |     |     | ✓                         | ✓   |
| There is a range of clinical disciplines represented on the TCPC                                                                                                                                                                                               | 4                    | 8           |                                   |     |     | ✓                         | ✓   |
| Risk management procedures are in place                                                                                                                                                                                                                        | 3                    | 13          |                                   |     |     |                           | ✓   |
| Any conflicts of interests are disclosed                                                                                                                                                                                                                       | 3                    | 10          |                                   |     |     |                           | ✓   |
| The TCPC operates within a reporting structure to ensure corporate and clinical governance                                                                                                                                                                     | 2                    | 11          |                                   |     |     | ✓                         | ✓   |
| There is a consumer representative on the TCPC                                                                                                                                                                                                                 | 1                    | 5           |                                   |     |     | ✓                         | ✓   |
| TCPC meetings are held at regular intervals                                                                                                                                                                                                                    | 1                    | 7           |                                   |     |     |                           | ✓   |
| A clear process for appeal is in place                                                                                                                                                                                                                         |                      | 9           | +                                 |     |     |                           | ✓   |
| Review of complex applications is facilitated by communication with other relevant committees (eg Research Ethics, Clinical Ethics, etc)                                                                                                                       |                      | 3           | +                                 |     |     |                           | ✓   |
| Sufficient staffing levels are provided to administer the Technology/Clinical Practice Program                                                                                                                                                                 |                      | 2           | +                                 |     |     |                           | ✓   |
| Definition of new technologies and clinical practices (TCPs) is provided                                                                                                                                                                                       |                      | 11          |                                   | +   |     | N/A                       | ✓   |
| Organisational policy on 'Introduction of new TCPs' is available                                                                                                                                                                                               |                      | 11          |                                   | +   |     | N/A                       | ✓   |
| Additional members can be co-opted to the TCPC for expertise, independence, etc as required                                                                                                                                                                    |                      | 7           |                                   | +   |     | N/A                       | ✓   |
| Responsibility for management, administration and review of policy on 'Introduction of new TCPs' is stated                                                                                                                                                     |                      | 6           |                                   | +   |     | N/A                       | ✓   |
| Organisational policy states that new TCPs cannot be introduced without approval                                                                                                                                                                               |                      | 6           |                                   | +   |     | N/A                       | ✓   |
| Meeting dates are scheduled in advance and published                                                                                                                                                                                                           |                      | 3           |                                   | +   |     | N/A                       | ✓   |
| Compliance with organisational policy on 'Introduction of new TCPs' is mandatory                                                                                                                                                                               |                      | 2           |                                   | +   |     | N/A                       | ✓   |
| Advice on whether TCP falls within the scope of 'Introduction of new TCPs' policy is provided                                                                                                                                                                  |                      | 2           |                                   | +   |     | N/A                       | ✓   |
| Manufacturers, vendors and suppliers are not permitted to submit a TCP application                                                                                                                                                                             |                      | 1           |                                   | +   |     | N/A                       | ✓   |
| There is expertise in EBP, Corporate Operations, Finance, Infrastructure and Equipment needs, Ethics and Legal issues on the TCPC                                                                                                                              |                      |             |                                   | +   |     | N/A                       | ✓   |
| External/independent expertise is available for advice to the decision-making committee                                                                                                                                                                        |                      | 8           |                                   | +   |     | N/A                       | ✓   |
| Sufficient staffing levels are provided for expert and independent input to application process                                                                                                                                                                |                      | 2           |                                   |     | +   | N/A                       | ✓   |
| TCPC members have sufficient levels of seniority, credibility and influence to make and implement appropriate and acceptable decisions                                                                                                                         |                      | 2           |                                   |     | +   | N/A                       |     |
| <b>Decision-Making</b>                                                                                                                                                                                                                                         |                      |             |                                   |     |     |                           |     |
| Evidence concerning a new TCP is robust and reliable                                                                                                                                                                                                           | 5                    | 16          |                                   |     |     |                           | ✓   |
| Ethics procedures are in place to protect patients, clinicians and the community                                                                                                                                                                               | 4                    | 15          |                                   |     |     | ✓                         | ✓   |
| Patient information and informed consent procedures are established                                                                                                                                                                                            | 3                    | 10          | +                                 |     |     | ✓                         | ✓   |
| There are established criteria for assessment of applications to introduce a new TCP                                                                                                                                                                           | 1                    | 11          | +                                 |     |     | ✓                         | ✓   |
| Safety of a new TCP is established                                                                                                                                                                                                                             |                      | 16          | +                                 |     |     |                           | ✓   |
| Legislative requirements are met                                                                                                                                                                                                                               |                      | 10          | +                                 |     |     |                           | ✓   |
| Issues of access and equity are considered                                                                                                                                                                                                                     |                      | 8           | +                                 |     |     |                           | ✓   |
| Recommendations for introduction have clearly noted conditions eg audit, clinical trial, operational restrictions                                                                                                                                              |                      | 8           | +                                 |     |     |                           | ✓   |

| PRINCIPLES                                                                                                                                                                                                                                                     | Literature citations |          | Identified by Monash Health staff |     |     | Monash Health performance |     |
|----------------------------------------------------------------------------------------------------------------------------------------------------------------------------------------------------------------------------------------------------------------|----------------------|----------|-----------------------------------|-----|-----|---------------------------|-----|
|                                                                                                                                                                                                                                                                | Dev N=5              | Rev N=16 | Dev                               | Imp | Rev | Dev                       | Rev |
| <i>Dev = Development phase, Imp = Implementation phase, Rev = Revision phase, N/A = Not applicable (identified after Development phase)</i><br><i>✓ = Principles incorporated in Monash Health processes, + = Principles identified by Monash Health staff</i> |                      |          |                                   |     |     |                           |     |
| Decisions of the committee are published to ensure transparency and accountability                                                                                                                                                                             |                      | 6        | +                                 |     |     |                           | ✓   |
| A clear process for handling urgent introductions of new TCPs to minimise patient harm is in place                                                                                                                                                             |                      | 4        | +                                 |     |     |                           | ✓   |
| Approval required for change of use of current TCP eg new indication/population/practitioners or modification to equipment/technique                                                                                                                           |                      | 4        | +                                 |     |     |                           | ✓   |
| Newly introduced TCPs are reassessed at the end of a predetermined monitoring period to reclassify as 'standard care'                                                                                                                                          |                      | 1        | +                                 |     |     |                           | ✓   |
| The new TCP has been evaluated or used elsewhere                                                                                                                                                                                                               |                      | 15       |                                   | +   |     | N/A                       | ✓   |
| Approval required, in addition to Human Research Ethics Committee authorisation, for introduction of a new TCP in a research project                                                                                                                           |                      | 5        |                                   | +   |     | N/A                       | ✓   |
| High level evidence is required if the application is based on a case for increased effectiveness (eg Systematic Review, RCT)                                                                                                                                  |                      | 4        |                                   | +   |     | N/A                       | ✓   |
| Any available evidence of cost-effectiveness of a new TCP is provided                                                                                                                                                                                          |                      | 8        |                                   | +   |     | N/A                       | ✓   |
| Regulatory approval is required                                                                                                                                                                                                                                |                      | 8        |                                   | +   |     | N/A                       | ✓   |
| Standards of practice set by professional associations are met                                                                                                                                                                                                 |                      | 6        |                                   | +   |     | N/A                       | ✓   |
| Health economics approach is included eg considering opportunity costs, indirect and direct costs and benefits, etc                                                                                                                                            |                      | 11       |                                   |     |     | N/A                       |     |
| <b>Application Process</b>                                                                                                                                                                                                                                     |                      |          |                                   |     |     |                           |     |
| Appropriate clinical and physical infrastructure/facilities exist to support the introduction of new TCPs                                                                                                                                                      | 5                    | 16       |                                   |     |     |                           | ✓   |
| Appropriate, credentialed and trained staff are in place for the introduction of new TCPs                                                                                                                                                                      | 5                    | 16       |                                   |     |     | ✓                         | ✓   |
| The projected financial costs for proposed TCP are estimated                                                                                                                                                                                                   | 5                    | 9        |                                   |     |     |                           | ✓   |
| Evidence-based practice informs conditions and logistics for introduction                                                                                                                                                                                      | 4                    | 14       |                                   |     |     |                           |     |
| Information about the TCP is disseminated and advice provided                                                                                                                                                                                                  | 4                    | 4        |                                   |     |     | ✓                         | ✓   |
| Completed applications are forwarded to the Chair of the TCPC or other nominated delegate                                                                                                                                                                      | 2                    | 10       |                                   |     |     | ✓                         | ✓   |
| A register of applications and approved TCPs is maintained                                                                                                                                                                                                     | 2                    | 6        |                                   |     |     | ✓                         | ✓   |
| Applications require endorsement from Departmental Head and Program/Division Director                                                                                                                                                                          | 2                    | 12       |                                   |     |     | ✓                         | ✓   |
| Appropriate training is provided to all staff so that each TCP is performed (and all equipment is handled) safely                                                                                                                                              | 2                    | 14       |                                   |     |     | ✓                         | ✓   |
| Clinical and financial effects of each TCP are considered at all levels and in all departments                                                                                                                                                                 | 1                    | 10       |                                   |     |     |                           | ✓   |
| Application forms contain questions on all decision-making criteria                                                                                                                                                                                            |                      | 8        | +                                 |     |     |                           | ✓   |
| Application forms are not accepted if they are incomplete or if there is insufficient detail for decision-making                                                                                                                                               |                      | 3        | +                                 |     |     |                           | ✓   |
| Opportunities for disinvestment of current practices following introduction of new TCP are identified                                                                                                                                                          |                      | 2        | +                                 |     |     |                           | ✓   |
| Application forms are completed and submitted electronically                                                                                                                                                                                                   |                      | 1        | +                                 |     |     |                           | ✓   |
| Application submission deadlines allow sufficient time for adequate review by committee members                                                                                                                                                                |                      | 1        | +                                 |     |     |                           | ✓   |
| Application forms for introduction of new TCPs are provided                                                                                                                                                                                                    |                      | 14       |                                   | +   |     | N/A                       | ✓   |
| Clinical need for TCP is addressed                                                                                                                                                                                                                             |                      | 14       |                                   | +   |     | N/A                       | ✓   |
| The existing financial costs for current practice are estimated                                                                                                                                                                                                |                      | 7        |                                   | +   |     | N/A                       | ✓   |
| Description of clinical governance arrangements and processes that oversee implementation of new TCP is provided                                                                                                                                               |                      | 6        |                                   | +   |     | N/A                       | ✓   |
| A detailed implementation plan and timeframe for introducing new TCP in a health service is provided                                                                                                                                                           |                      | 4        |                                   | +   |     | N/A                       | ✓   |
| Applicants are informed in writing of the outcome and recommendations of the committee                                                                                                                                                                         |                      | 4        |                                   | +   |     | N/A                       | ✓   |
| Details of any assessment of the TCP by national health policy agency are provided (eg Australian Medical Services Advisory Committee)                                                                                                                         |                      | 3        |                                   | +   |     | N/A                       | ✓   |

| PRINCIPLES                                                                                                                                                                                                                                               | Literature citations |          | Identified by Monash Health staff |     |     | Monash Health performance |     |
|----------------------------------------------------------------------------------------------------------------------------------------------------------------------------------------------------------------------------------------------------------|----------------------|----------|-----------------------------------|-----|-----|---------------------------|-----|
|                                                                                                                                                                                                                                                          | Dev N=5              | Rev N=16 | Dev                               | Imp | Rev | Dev                       | Rev |
| <i>Dev = Development phase, Imp = Implementation phase, Rev = Revision phase, N/A = Not applicable (identified after Development phase)<br/>✓ = Principles incorporated in Monash Health processes, + = Principles identified by Monash Health staff</i> |                      |          |                                   |     |     |                           |     |
| Procurement staff are aware of need for TCPC approval before purchases are made                                                                                                                                                                          |                      | 3        |                                   | +   |     | N/A                       | ✓   |
| Applicants, Department Heads and Program/Division Directors respond to queries raised by TCPC (at meeting or by correspondence)                                                                                                                          |                      | 2        |                                   | +   |     | N/A                       | ✓   |
| Application forms meet the requirements of regional, state and/or national applications for introduction or funding of new TCPs                                                                                                                          |                      | 2        |                                   | +   |     | N/A                       | ✓   |
| Application guidelines are available                                                                                                                                                                                                                     |                      | 1        |                                   | +   |     | N/A                       | ✓   |
| Contact details of external referees with experience in the new TCP are provided                                                                                                                                                                         |                      | 1        |                                   | +   |     | N/A                       | ✓   |
| Successful applicants are informed in writing of the conditions of implementation and reporting requirements                                                                                                                                             |                      | 1        |                                   | +   |     | N/A                       | ✓   |
| Application forms are provided for two year review, change of use of existing TCP and use of new TCP in research                                                                                                                                         |                      |          |                                   | +   |     | N/A                       | ✓   |
| Objective and suitable expertise is used for issues relating to resources (financial, space, equipment, staff)                                                                                                                                           |                      | 7        |                                   |     | +   | N/A                       |     |
| Objective and suitable expertise is used to identify the best available evidence from the research literature                                                                                                                                            |                      | 3        |                                   |     | +   | N/A                       |     |
| Evidence provided is based on a rigorous systematic review of the research literature                                                                                                                                                                    |                      | 3        |                                   |     | +   | N/A                       |     |
| Relevant existing policies/procedures in the organisation are considered when introducing new TCPs                                                                                                                                                       |                      | 10       |                                   |     |     | N/A                       |     |
| An evaluation protocol for the new TCP is provided (including all relevant indicators and defined time points)                                                                                                                                           |                      | 6        |                                   |     |     | N/A                       |     |
| Alternatives to the new TCP are listed and compared                                                                                                                                                                                                      |                      | 5        |                                   |     |     | N/A                       |     |
| Applicant discusses 'Impact of Not Proceeding' considering patient safety, government policy, financial implications, service delivery, etc                                                                                                              |                      | 2        |                                   |     |     | N/A                       |     |
| Issue of credentialing in emergency situations is addressed                                                                                                                                                                                              |                      | 2        |                                   |     |     | N/A                       |     |
| Applicant completes Workforce Impact Statement considering current/future shortages, education and training, industrial issues, etc                                                                                                                      |                      | 1        |                                   |     |     | N/A                       |     |
| Include manufacturer, vendor, supplier information for purposes of describing new TCP, legal/contractual issues, etc                                                                                                                                     |                      | 1        |                                   |     |     | N/A                       |     |
| Choice between new, existing and other alternatives should be made based on direct comparisons ie 'head to head'                                                                                                                                         |                      |          |                                   |     | +   | N/A                       |     |
| <b>Monitoring and Reporting</b>                                                                                                                                                                                                                          |                      |          |                                   |     |     |                           |     |
| Specified outcomes for each approved TCP are monitored and reviewed                                                                                                                                                                                      | 5                    | 11       | +                                 |     |     |                           | ✓   |
| Any adverse event occurring with a new TCP is notified to the TCPC                                                                                                                                                                                       | 3                    | 6        |                                   |     |     | ✓                         | ✓   |
| Determine processes/requirements for monitoring and reviewing existing TCP                                                                                                                                                                               | 2                    | 11       | +                                 |     |     |                           | ✓   |
| Regular reports are submitted to the state health department detailing applications, approvals, monitoring of new TCPs                                                                                                                                   | 2                    | 5        |                                   |     |     |                           | ✓   |
| Regular reports (at an agreed/ defined interval) are submitted to the health service executive                                                                                                                                                           | 2                    | 4        |                                   |     |     |                           | ✓   |
| Local consumer health councils and networks will be informed of applications and of their outcomes                                                                                                                                                       | 1                    | 1        |                                   |     |     |                           | ✓   |
| Prompts are sent to applicants prior to the due date for reporting of outcomes                                                                                                                                                                           |                      |          |                                   | +   |     | N/A                       | ✓   |
| Reminders are sent if outcomes reports are not received by the due date                                                                                                                                                                                  |                      |          |                                   | +   |     | N/A                       | ✓   |
| Permission to practice using the new TCP is withdrawn if outcomes reports are not received after a specified number of reminders                                                                                                                         |                      |          |                                   | +   |     | N/A                       | ✓   |
| Applicants are required to notify TCPC that all specified conditions have been met prior to implementation of a new TCP                                                                                                                                  |                      |          |                                   | +   |     | N/A                       | ✓   |
| Outcomes are collated in a database/register                                                                                                                                                                                                             |                      | 7        |                                   | +   |     | N/A                       | ✓   |
| Applicants are required to report specified outcomes to TCPC at agreed defined interval (eg 6 monthly for 2 years)                                                                                                                                       |                      | 5        |                                   | +   |     | N/A                       | ✓   |
| Any adverse event occurring with a new TCP is notified to the relevant authority (if regulated eg Therapeutic Goods Administration)                                                                                                                      |                      | 4        |                                   | +   |     | N/A                       | ✓   |
| If the TCP carries risk of adverse events, criteria for reviewing outcomes are established prior to procedures being performed                                                                                                                           |                      | 4        |                                   |     |     | N/A                       |     |
| Ethics approval as a Quality Assurance activity is obtained prior to data collection                                                                                                                                                                     |                      |          |                                   |     | +   | N/A                       | ✓   |

| PRINCIPLES                                                                                                                                                                                                                                               | Literature citations |             | Identified by Monash Health staff |           |           | Monash Health performance |           |            |
|----------------------------------------------------------------------------------------------------------------------------------------------------------------------------------------------------------------------------------------------------------|----------------------|-------------|-----------------------------------|-----------|-----------|---------------------------|-----------|------------|
|                                                                                                                                                                                                                                                          | Dev<br>N=5           | Rev<br>N=16 | Dev                               | Imp       | Rev       | Dev                       | Rev       |            |
| <i>Dev = Development phase, Imp = Implementation phase, Rev = Revision phase, N/A = Not applicable (identified after Development phase)<br/>✓ = Principles incorporated in Monash Health processes, + = Principles identified by Monash Health staff</i> |                      |             |                                   |           |           |                           |           |            |
| <b>Resources</b>                                                                                                                                                                                                                                         |                      |             |                                   |           |           |                           |           |            |
| Expertise in coding, data analysis, evidence review, finance and credentialing is provided                                                                                                                                                               |                      | 5           | +                                 |           |           |                           | ✓         |            |
| Applicants are directed to guidance on finding the evidence of effectiveness of TCPs to support the application                                                                                                                                          |                      | 4           | +                                 |           |           |                           | ✓         |            |
| Template for Patient information brochure is provided                                                                                                                                                                                                    |                      | 2           | +                                 |           |           |                           | ✓         |            |
| Templates for data collection tools and reporting proformas are provided (for therapeutic interventions)                                                                                                                                                 |                      | 1           | +                                 |           |           |                           | ✓         |            |
| Website housing documents and resources is developed and maintained                                                                                                                                                                                      |                      | 1           | +                                 |           |           |                           | ✓         |            |
| List of organisations that can provide evidence for the effectiveness of TCPs and in some cases service configuration are provided                                                                                                                       |                      | 8           |                                   | +         |           | N/A                       | ✓         |            |
| Assessment guidelines are provided ie how evidence submitted will be assessed                                                                                                                                                                            |                      | 2           |                                   | +         |           | N/A                       | ✓         |            |
| Templates for appraising, summarising and presenting the evidence are provided                                                                                                                                                                           |                      | 2           |                                   | +         |           | N/A                       | ✓         |            |
| Business case guidelines are available                                                                                                                                                                                                                   |                      | 3           |                                   |           |           | N/A                       |           |            |
| Formal Risk Assessment Tool is provided                                                                                                                                                                                                                  |                      | 2           |                                   |           |           | N/A                       |           |            |
| Templates for data collection tools and reporting proformas are provided (for diagnostic tests)                                                                                                                                                          |                      | 1           |                                   |           | +         | N/A                       |           |            |
| Business case template is provided                                                                                                                                                                                                                       |                      | 1           |                                   |           |           | N/A                       |           |            |
| Life-cycle costing template is provided                                                                                                                                                                                                                  |                      | 1           |                                   |           |           | N/A                       |           |            |
| Guidance on approach for conducting economic evaluation is available                                                                                                                                                                                     |                      | 1           |                                   |           |           | N/A                       |           |            |
| Expertise in contract negotiation and equipment maintenance requirements is provided                                                                                                                                                                     |                      |             |                                   |           | +         | N/A                       |           |            |
| <b>Administration</b>                                                                                                                                                                                                                                    |                      |             |                                   |           |           |                           |           |            |
| Staff with appropriate expertise and sufficient time are designated to manage the TCP program (eg Executive Officer, Administrator, etc)                                                                                                                 |                      | 7           |                                   | +         |           | N/A                       | ✓         |            |
| Systems, processes and resources are developed, implemented, maintained, evaluated and improved                                                                                                                                                          |                      | 4           |                                   | +         |           | N/A                       | ✓         |            |
| Processes are facilitated through checklists, timelines, diarising of due dates, electronic reminders, etc                                                                                                                                               |                      |             |                                   | +         |           | N/A                       | ✓         |            |
| <b>Evaluation and Quality Improvement</b>                                                                                                                                                                                                                |                      |             |                                   |           |           |                           |           |            |
| Data collection methods are established                                                                                                                                                                                                                  |                      | 4           |                                   | +         |           | N/A                       | ✓         |            |
| Evaluation findings are published                                                                                                                                                                                                                        |                      | 3           |                                   | +         |           | N/A                       | ✓         |            |
| A framework and plan for evaluation of the TCP program is developed and implemented                                                                                                                                                                      |                      | 2           |                                   | +         |           | N/A                       | ✓         |            |
| Feedback is sought from decision-makers and administrators on systems and processes                                                                                                                                                                      |                      | 1           |                                   | +         |           | N/A                       | ✓         |            |
| Application forms have feedback page to capture comments from users                                                                                                                                                                                      |                      |             |                                   | +         |           | N/A                       | ✓         |            |
| Feedback is sought from applicants on Content, Wording and Format of Application forms, Assistance provided and Resources available                                                                                                                      |                      |             |                                   | +         |           | N/A                       | ✓         |            |
| Improvements to systems, processes, documents and resources are implemented based on evaluation findings                                                                                                                                                 |                      |             |                                   | +         |           | N/A                       | ✓         |            |
| <b>TOTAL</b>                                                                                                                                                                                                                                             | <b>122</b>           | <b>27</b>   | <b>109</b>                        | <b>25</b> | <b>51</b> | <b>9</b>                  | <b>14</b> | <b>100</b> |
